# Supplementary material for: Resilience and resistance: powers help phytoplankton to keep spatial heterogeneity during long-term intermittent water diversion
Source: Research Square preprint supplement (doi:10.21203/rs.3.rs-999849/v1), 2021-10-21
Supplement: Supplementary file 2 [file 4b8bab8b5964469620646b35.docx]

**Resilience and resistance: powers help phytoplankton to keep spatial heterogeneity during long-term intermittent water diversion**

Shasha Zhanga, Hangzhou Xua,c, Jielin Weia, Qian Lid, Qing Yane, and Haiyan Peia,b,c *

*a School of Environmental Science and Engineering, Shandong University, Qingdao, 266237, China*

*b Department of Environmental Science and Engineering, Fudan University, Shanghai, 200433, China*

*c Shandong Provincial Engineering Center on Environmental Science and Technology, Jinan, 250061, China*

*d. Xuzhou Department of Hydrology and Water Resources Survey Office in Jiangsu Province, Xuzhou, 221000, China*

*e. Huai’an Department of Hydrology and Water Resources Survey Office in Jiangsu Province, Huai’an, 223005, China*

* *Corresponding author: Department of Environmental Science and Engineering, Fudan University, Shanghai, 200433, China*

*E-mail address: haiyan_phyto@fudan.edu.cn,* [*haiyanhup@126.com*](mailto:haiyanhup@126.com)

**Fig. S1. Temporal record of phytoplankton abundance and cyanobacteria density decreased after water diversion in (a) Luoma Lake, (b) Nansi Lake, and (c) Dongping Lake.**

**Fig. S2.** **Temporal development of WT, TN and TP for different sampling sites in Luoma, Nansi and Dongping lakes.**

**Fig. S3. Structures of phytoplankton co-occurrence networks during non-water-diversion months and water-diversion months in different years for Luoma Lake.** Nodes correspond to phyla and links correspond to statistically signiﬁcant associations. Nodes are coloured according to their taxonomy. A node’s size represents the strength of the links in the communities comprising their network.

**Fig. S4. Structures of phytoplankton co-occurrence networks during non-water-diversion months and water-diversion months in different years for Nansi Lake.** Nodes correspond to phyla and links correspond to statistically signiﬁcant associations. Nodes are coloured according to their taxonomy. A node’s size represents the strength of the links in the communities comprising their network.

**Fig. S5. Structures of phytoplankton co-occurrence networks during non-water-diversion months and water-diversion months in different years for Dongping Lake.** Nodes correspond to phyla and links correspond to statistically signiﬁcant associations. Nodes are coloured according to their taxonomy. A node’s size represents the strength of the links in the communities comprising their network.

**Fig. S6. Ratios of diversity to clustering coefficient in different lakes and at different water diversion stages.**

**Fig. S7. Relative contributions of different environmental types to phytoplankton community composition.** Physical indicators comprise WT, DO and transparency; chemical indicators include pH, CODMn, NH3-N, TN and TP; lake shape refers to classification as either strip or round.

**Fig. S8. Alpha diversity of abundant phytoplankton and water transfer had no obvious effect on community diversity and evenness of abundant algae in different lakes.** The solid line denotes the fitting line of the average values which was calculated in respective monitoring points and monitoring months.

**Fig. S9. Alpha diversity of rare phytoplankton in different lakes.** The solid line denotes the fitting line of the average values which was calculated in respective monitoring points and monitoring months.

**Fig. S10. Temporal changes in phytoplankton community composition across multiple years for Luoma Lake and Nansi Lake.** Each point in the NMDS plot represents a sample, with distances between samples calculated as a measure of community composition. Different shapes represent different lakes. Unfilled symbols represent samples before water diversion, and filled symbols represent samples after water diversion.

**Fig. S11. Temporal changes in phytoplankton community composition across multiple years for Nansi Lake and Dongping Lake.** Each point in the NMDS plot represents a sample, with distances between samples calculated as a measure of community composition. Different shapes represent different lakes. Unfilled symbols represent samples before water diversion, and filled symbols represent samples after water diversion.

**Table S1. The annual quantity (unit: km3) of water diversion for four lakes.**

| Lake | 2013–2014 | 2014–2015 | 2015–2016 | 2016–2017 | 2017–2018 | 2018–2019 |
| --- | --- | --- | --- | --- | --- | --- |
| Hongze | 0.357 | 0 | 0 | 0.272 | 0 | 0.452 |
| Luoma | 0.268 | 0.352 | 0.682 | 0.766 | 1.170 | 0.910 |
| Nansi | 0.248 | 0.309 | 0.602 | 0.889 | 1.085 | 0.844 |
| Dongping | 0.154 | 0.225 | 0.385 | 0.767 | 0.923 | 0.712 |

**Table S2.** **Detailed description of abundant and rare phytoplankton in Luoma Lake.**

| Category | 2011 | 2012 | 2013 | 2014 | 2015 | 2016 | 2017 | 2018 | 2019 |
| --- | --- | --- | --- | --- | --- | --- | --- | --- | --- |
| Always abundant taxa | 1 (0.6%) | 2 (0.9%) | 3 (1.4%) | 2 (1.0 %) | 0 (0.0%) | 1 (0.4%) | 1 (0.5%) | 2 (0.9%) | 1 (0.5%) |
| Conditionally abundant taxa | 5 (2.9%) | 4 (1.8%) | 8 (3.7%) | 7 (3.7%) | 8 (4.0%) | 5 (2.1%) | 3 (1.4%) | 1 (0.4%) | 4 (1.8%) |
| Always rare taxa | 0 (0%) | 0 (0%) | 0 (0%) | 0 (0%) | 0 (0%) | 0 (0%) | 0 (0%) | 0 (0%) | 0 (0%) |
| Conditionally rare taxa | 120 (68.9%) | 150 (67.6%) | 157 (73.0%) | 134 (70.2%) | 140 (68.9%) | 181 (77.4%) | 156 (73.9%) | 171 (74.0%) | 151 (67.7%) |
| Moderately abundant taxa | 0 (0%) | 0 (0%) | 0 (0%) | 0 (0%) | 0 (0%) | 0 (0%) | 0 (0%) | 0 (0%) | 0 (0%) |
| Conditionally rare  and abundant taxa | 48 (27.6%) | 66 (29.7%) | 47 (21.9%) | 48 (25.1%) | 55 (27.1%) | 47 (20.1%) | 51 (24.2%) | 57 (24.7%) | 67 (30.0%) |

Always abundant taxa (AAT) were defined as the algae with a relative abundance ≥1% in all samples.

Conditionally abundant taxa (CAT) were defined as the algae with a relative abundance ≥1% in some samples, but never rare (<0.01%) in any sample.

Always rare taxa (ART) were defined as the algae with a relative abundance <0.01% in all samples.

Conditionally rare taxa (CRT) were defined as the algae with a relative abundance <0.01% in some samples, but never abundant (≥1%) in any sample.

Moderately abundant taxa (MT) were defined as the algae with a relative abundance between 0.01% and 1% in all samples.

Conditionally rare and abundant taxa (CRAT) were defined as the algae with a relative abundance varying from rare (<0.01%) to abundant (≥1%).

**Table S3.** **Detailed description of abundant and rare phytoplankton in Nansi Lake.**

| Category | 2011 | 2012 | 2013 | 2014 | 2015 | 2016 | 2017 | 2018 | 2019 |
| --- | --- | --- | --- | --- | --- | --- | --- | --- | --- |
| Always abundant taxa | 1 (0.5%) | 2 (1.0%) | 2 (1.0%) | 4 (2.2%) | 1 (0.5%) | 2 (0.8%) | 2 (0.9%) | 3 (1.5%) | 4 (2.2%) |
| Conditionally abundant taxa | 8 (4.1%) | 6 (2.9%) | 11 (4.8%) | 18 (9.8%) | 5 (2.3%) | 10 (4.2%) | 8 (3.4%) | 6 (3.1%) | 8 (4.3%) |
| Always rare taxa | 0 (0%) | 0 (0%) | 0 (0%) | 0 (0%) | 0 (0%) | 0 (0%) | 0 (0%) | 0 (0%) | 0 (0%) |
| Conditionally rare taxa | 129 (65.5%) | 144 (69.2%) | 154 (67.8%) | 128 (69.9%) | 147 (68.7%) | 160 (67.5%) | 168 (72.4%) | 130 (66.7%) | 128 (69.6%) |
| Moderately abundant taxa | 0 (0%) | 0 (0%) | 0 (0%) | 0 (0%) | 0 (0%) | 0 (0%) | 0 (0%) | 0 (0%) | 0 (0%) |
| Conditionally rare and abundant taxa | 59 (29.9%) | 56 (26.9%) | 60 (26.4%) | 33 (18.0%) | 61 (28.5%) | 65 (27.4%) | 54 (23.3%) | 56 (28.7%) | 44 (23.9%) |

Always abundant taxa (AAT) were defined as the algae with a relative abundance ≥1% in all samples.

Conditionally abundant taxa (CAT) were defined as the algae with a relative abundance ≥1% in some samples, but never rare (<0.01%) in any sample.

Always rare taxa (ART) were defined as the algae with a relative abundance <0.01% in all samples.

Conditionally rare taxa (CRT) were defined as the algae with a relative abundance <0.01% in some samples, but never abundant (≥1%) in any sample.

Moderately abundant taxa (MT) were defined as the algae with a relative abundance between 0.01% and 1% in all samples.

Conditionally rare and abundant taxa (CRAT) were defined as the algae with a relative abundance varying from rare (<0.01%) to abundant (≥1%).

**Table S4.** **Detailed description of abundant and rare phytoplankton in Dongping Lake.**

| Category | 2011 | 2012 | 2013 | 2014 | 2015 | 2016 | 2017 | 2018 | 2019 |
| --- | --- | --- | --- | --- | --- | --- | --- | --- | --- |
| Always abundant taxa | 0 (0%) | 1 (0.6%) | 2 (1.2%) | 3 (2.0%) | 1 (0.6%) | 2 (1.1%) | 2 (1.1%) | 2 (1.2%) | 3 (2.0%) |
| Conditionally abundant taxa | 1 (0.7%) | 3 (1.9%) | 3 (1.8%) | 3 (2.0%) | 4 (2.4%) | 7 (3.9%) | 4 (2.1%) | 4 (2.4%) | 7 (4.6%) |
| Always rare taxa | 0 (0%) | 0 (0%) | 0 (0%) | 0 (0%) | 0 (0%) | 0 (0%) | 0 (0%) | 0 (0%) | 0 (0%) |
| Conditionally rare taxa | 101 (68.2%) | 96 (60.4%) | 102 (61.1%) | 90 (60.8%) | 96 (57.5%) | 123 (67.9%) | 128 (67.0%) | 90 (54.9%) | 85 (56.3%) |
| Moderately abundant taxa | 0 (0%) | 0 (0%) | 0 (0%) | 0 (0%) | 0 (0%) | 0 (0%) | 0 (0%) | 0 (0%) | 0 (0%) |
| Conditionally rare and abundant taxa | 46 (31.1%) | 59 (37.1%) | 60 (35.9%) | 52 (35.2%) | 66 (39.5%) | 49 (27.1%) | 57 (29.8%) | 68 (41.5%) | 56 (37.1%) |

Always abundant taxa (AAT) were defined as the algae with a relative abundance ≥1% in all samples.

Conditionally abundant taxa (CAT) were defined as the algae with a relative abundance ≥1% in some samples, but never rare (<0.01%) in any sample.

Always rare taxa (ART) were defined as the algae with a relative abundance <0.01% in all samples.

Conditionally rare taxa (CRT) were defined as the algae with a relative abundance <0.01% in some samples, but never abundant (≥1%) in any sample.

Moderately abundant taxa (MT) were defined as the algae with a relative abundance between 0.01% and 1% in all samples.

Conditionally rare and abundant taxa (CRAT) were defined as the algae with a relative abundance varying from rare (<0.01%) to abundant (≥1%).

**Table S5.** **Detailed listing of abundant algal species in Luoma Lake.** The colour-shaded was common algae in sampling period.

| Luoma Lake | 2011 | 2012 | 2013 | 2014 | 2015 | 2016 | 2017 | 2018 | 2019 |
| --- | --- | --- | --- | --- | --- | --- | --- | --- | --- |
|  | *Chlorella*  *vulgaris* | *Chlorella vulgaris* | *Chlorella vulgaris* | *Chlorella vulgaris* | *Chlorella vulgaris* | *Synedra acus* | *Chlorella vulgaris* | *Chlorella vulgaris* | *Chlorella vulgaris* |
|  | *Chlorella ellipsoidea* | *Chroomonas acuta* | *Chroomonas acuta* | *Chroomonas acuta* | *Chlorella ellipsoidea* | *Chlorella vulgaris* | *Melosira granulate* | *Chlorella ellipsoidea* | *Synedra acus* |
|  | *Kirchneriella obesa* | *Chlorella saccharophila* | *Chlorella ellipsoidea* | *Ankistrodesmus angustus* | *Ankistrodesmus angustus* | *Chlorella ellipsoidea* | *Synedra acus* | *Chroomonas acuta* | *Pseudanabaena limnetica* |
|  | *Fragilaria capucina* | *Kirchneriella obesa* | *Kirchneriella obesa* | *Monoraphidium contortum* | *Scenedesmus apiculatus* | *Cyclotella meneghiniana* | *Chroomonas acuta* |  | *Chroomonas acuta* |
|  | *Synedra acus* | *Cryptomonas ovata* | *Ankistrodesmus acicularis* | *Cyclotella meneghiniana* | *Scenedesmus abundans* | *Pseudanabaena limnetica* |  |  | *Cryptomonas erosa* |
|  | *Pseudanabaena limnetica* | *Cryptomonas erosa* | *Monoraphidium contortum* | *Synedra amphicephala* | *Synedra amphicephala* | *Chroomonas acuta* |  |  |  |
|  |  |  | *Scenedesmus arcuatus* | *Synedra acus* | *Synedra acus* |  |  |  |  |
|  |  |  | *Scenedesmus abundans* | *Lepocinclis longistriata* | *Cryptomonas ovata* |  |  |  |  |
|  |  |  | *Synedra acus* | *Cryptomonas ovata* |  |  |  |  |  |
|  |  |  | *Achnanthes exigua* |  |  |  |  |  |  |
|  |  |  | *Pseudanabaena limnetica* |  |  |  |  |  |  |

**Table S6. Detailed listing of abundant algal species in Nansi Lake.** The colour-shaded was common algae in sampling period.

| Nansi Lake | 2011 | 2012 | 2013 | 2014 | 2015 | 2016 | 2017 | 2018 | 2019 |
| --- | --- | --- | --- | --- | --- | --- | --- | --- | --- |
|  | *Chlorella vulgaris* | *Cyclotella stelligera* | *Chlorella vulgaris* | *Chlorella vulgaris* | *Chlorella vulgaris* | *Chlorella vulgaris* | *Chlorella vulgaris* | *Chlorella vulgaris* | *Chlorella vulgaris* |
|  | *Chlamydomonas microsphaera* | *Pseudanabaena limnetica* | *Chroomonas acuta* | *Pedinomonas minor* | *Scenedesmus apiculatus* | *Synedra acus* | *Chroomonas acuta* | *Synedra acus* | *Chlorella saccharophila* |
|  | *Kirchneriella obesa* | *Chlorella vulgaris* | *Chlamydomonas microsphaera* | *Cyclotella meneghiniana* | *Cyclotella meneghiniana* | *Chlorella ellipsoidea* | *Chlamydomonas microsphaera* | *Chroomonas acuta* | *Synedra acus* |
|  | *Ankistrodesmus angustus* | *Ankistrodesmus angustus* | *Chlorella ellipsoidea* | *Chroomonas acuta* | *Synedra acus* | *Ankistrodesmus angustus* | *Scenedesmus apiculatus* | *Chlamydomonas microsphaera* | *Chroomonas acuta* |
|  | *Monoraphidium contortum* | *Monoraphidium contortum* | *Oocystis* *borgei* | *Chlamydomonas microsphaera* | *Achnanthes exigua* | *Scenedesmus apiculatus* | *Melosira granulate* | *Chlorella ellipsoidea* | *Chlamydomonas microsphaera* |
|  | *Cyclotella stelligera* | *Oocystis* *borgei* | *Cyclotella meneghiniana* | *Chlorella ellipsoidea* | *Navicula delognei* | *Synedra affinis* | *Cyclotella meneghiniana* | *Chlorella saccharophila* | *Chlorella ellipsoidea* |
|  | *Synedra amphicephala* | *Fragilaria capucina* | *Cyclotella comta* | *Selenastrum spinulosum* |  | *Achnanthes exigua* | *Cyclotella comta* | *Kirchneriella obesa* | *Cyclotella meneghiniana* |
|  | *Synedra acus* | *Chroomonas acuta* | *Synedra affinis* | *Oocystis borgei* |  | *Pseudanabaena limnetica* | *Cyclotella comensis* | *Scenedesmus apiculatus* | *Fragilaria capucina* |
|  | *Chroomonas acuta* |  | *Synedra amphicephala* | *Microspora stagnorum* |  | *Lepocinclis longistriata* | *Pseudanabaena limnetica* | *Lepocinclis longistriata* | *Pseudanabaena limnetica* |
|  |  |  | *Synedra acus* | *Cyclotella comta* |  | *Trachelomonas granulosa* | *Chromulina ovalis* |  | *Lepocinclis longistriata* |
|  |  |  | *Lepocinclis longistriata* | *Synedra affinis* |  | *Chroomonas acuta* |  |  | *Cryptomonas ovata* |
|  |  |  | *Cryptomonas richei* | *Synedra amphicephala* |  | *Fragilaria hyalina* |  |  | *Cryptomonas*  *erosa* |
|  |  |  |  | *Synedra acus* |  |  |  |  |  |
|  |  |  |  | *Cocconeis placentula* |  |  |  |  |  |
|  |  |  |  | *Achnanthes exigua* |  |  |  |  |  |

**Table S6. (Continued)**

| Nansi Lake | 2011 | 2012 | 2013 | 2014 | 2015 | 2016 | 2017 | 2018 | 2019 |
| --- | --- | --- | --- | --- | --- | --- | --- | --- | --- |
|  |  |  |  | *Lepocinclis longistriata* |  |  |  |  |  |
|  |  |  |  | *Lepocinclis texta* |  |  |  |  |  |
|  |  |  |  | *Monallantus brevicylindrus* |  |  |  |  |  |
|  |  |  |  | *Chromulina ovalis* |  |  |  |  |  |
|  |  |  |  | *Navicula delognei* |  |  |  |  |  |
|  |  |  |  | *Chlamydomonas semiampla* |  |  |  |  |  |
|  |  |  |  | *Selenastrum spinulosum* |  |  |  |  |  |

**Table S7.** **Detailed listing of abundant algal species in Dongping Lake.** The colour-shaded was common algae in sampling period.

| Dongping Lake | 2011 | 2012 | 2013 | 2014 | 2015 | 2016 | 2017 | 2018 | 2019 |
| --- | --- | --- | --- | --- | --- | --- | --- | --- | --- |
|  | *Chlorella vulgaris* | *Chroomonas acuta* | *Chlorella vulgaris* | *Chlorella ellipsoidea* | *Chlorella vulgaris* | *Chlorella vulgaris* | *Chlorella vulgaris* | *Chlorella vulgaris* | *Chlorella ellipsoidea* |
|  |  | *Chlorella vulgaris* | *Chroomonas acuta* | *Chlorella vulgaris* | *Chlorella ellipsoidea* | *Chroomonas acuta* | *Chroomonas acuta* | *Chroomonas acuta* | *Chlorella vulgaris* |
|  |  | *Synedra acus* | *Chlamydomonas microsphaera* | *Chroomonas acuta* | *Synedra acus* | *Chlamydomonas microsphaera* | *Cyclotella meneghiniana* | *Chlamydomonas microsphaera* | *Chlorella saccharophila* |
|  |  | *Cryptomonas erosa* | *Chlorella ellipsoidea* | *Rhabdoderma lineare* | *Pseudanabaena limnetica* | *Chlorella ellipsoidea* | *Cyclotella comta* | *Chlorella ellipsoidea* | *Chlamydomonas microsphaera* |
|  |  |  | *Synedra acus* | *Monallantus brevicylindrus* | *Chroomonas acuta* | *Ankistrodesmus angustus* | *Synedra acus* | *Cyclotella meneghiniana* | *Selenastrum bibraianum* |
|  |  |  |  |  |  | *Scenedesmus apiculatus* | *Pseudanabaena limnetica* | *Synedra acus* | *Cyclotella comensis* |
|  |  |  |  |  |  | *Cyclotella comensis* |  |  | *Cyclotella meneghiniana* |
|  |  |  |  |  |  | *Synedra acus* |  |  | *Synedra acus* |
|  |  |  |  |  |  | *Cryptomonas erosa* |  |  | *Chroomonas acuta* |
|  |  |  |  |  |  |  |  |  | *Cryptomonas ovata* |

**Table S8.** **Characteristics of phytoplankton networks constructed for water-diversion and non-water-diversion phases within Luoma Lake, Nansi Lake and Dongping Lake.**

|  | Luoma Lake | | Nansi Lake | | Dongping Lake | |
| --- | --- | --- | --- | --- | --- | --- |
|  | Non-WD | WD | Non-WD | WD | Non-WD | WD |
| Nodes/Lines | 65/154 | 59/174 | 79/206 | 61/212 | 65/205 | 58/192 |
| Density | 0.074 | 0.102 | 0.067 | 0.116 | 0.099 | 0.116 |
| Clustering coefficient | 0.489 | 0.516 | 0.564 | 0.628 | 0.549 | 0.439 |
| D/T | 0.151 | 0.197 | 0.119 | 0.185 | 0.180 | 0.264 |

**Table S9.** **Characteristics of phytoplankton networks constructed for water-diversion and non-water-diversion phases in each year within Luoma Lake.**

|  | 2013 | | 2014 | | 2015 | | 2016 | | 2017 | | 2018 | | 2019 | |
| --- | --- | --- | --- | --- | --- | --- | --- | --- | --- | --- | --- | --- | --- | --- |
|  | Non-WD | WD | Non-WD | WD | Non-WD | WD | Non-WD | WD | Non-WD | WD | Non-WD | WD | Non-WD | WD |
| Nodes/Lines | 60/131 | 51/198 | 55//152 | 46/262 | 51/109 | 41/135 | 49/127 | 58/173 | 41/129 | 44/116 | 65/556 | 48/194 | 56/172 | 60/155 |
| Density | 0.074 | 0.155 | 0.102 | 0.253 | 0.085 | 0.165 | 0.108 | 0.105 | 0.157 | 0.123 | 0.267 | 0.172 | 0.112 | 0.088 |
| Clustering coefficient | 0.536 | 0.626 | 0.54 | 0.65 | 0.51 | 0.613 | 0.596 | 0.632 | 0.703 | 0.58 | 0.73 | 0.589 | 0.578 | 0.563 |
| D/T | 0.138 | 0.247 | 0.189 | 0.389 | 0.167 | 0.269 | 0.181 | 0.166 | 0.223 | 0.212 | 0.366 | 0.292 | 0.194 | 0.156 |

**Table S10.** **Characteristics of phytoplankton networks constructed for water-diversion and non-water-diversion phases in each year within Nansi Lake.**

|  | 2013 | | 2014 | | 2015 | | 2016 | | 2017 | | 2018 | | 2019 | |
| --- | --- | --- | --- | --- | --- | --- | --- | --- | --- | --- | --- | --- | --- | --- |
|  | Non-WD | WD | Non-WD | WD | Non-WD | WD | Non-WD | WD | Non-WD | WD | Non-WD | WD | Non-WD | WD |
| Nodes/Lines | 73/226 | 70/251 | 62//135 | 45/219 | 68/138 | 62/256 | 61/145 | 59/191 | 61/155 | 46/112 | 67/103 | 39/157 | 54/118 | 42/106 |
| Density | 0.086 | 0.104 | 0.071 | 0.221 | 0.061 | 0.135 | 0.079 | 0.112 | 0.085 | 0.108 | 0.047 | 0.212 | 0.082 | 0.123 |
| Clustering coefficient | 0.602 | 0.557 | 0.727 | 0.635 | 0.629 | 0.567 | 0.655 | 0.602 | 0.596 | 0.569 | 0.507 | 0.633 | 0.528 | 0.517 |
| D/T | 0.143 | 0.187 | 0.089 | 0.348 | 0.097 | 0.238 | 0.121 | 0.186 | 0.143 | 0.189 | 0.093 | 0.335 | 0.155 | 0.238 |

**Table S11.** **Characteristics of phytoplankton networks constructed for water-diversion and non-water-diversion phases in each year within Dongping Lake.**

|  | 2013 | | 2014 | | 2015 | | 2016 | | 2017 | | 2018 | | 2019 | |
| --- | --- | --- | --- | --- | --- | --- | --- | --- | --- | --- | --- | --- | --- | --- |
|  | Non-WD | WD | Non-WD | WD | Non-WD | WD | Non-WD | WD | Non-WD | WD | Non-WD | WD | Non-WD | WD |
| Nodes/Lines | 48/199 | 49/203 | 49//140 | 49/185 | 49/184 | 47/232 | 47/228 | 37/151 | 53/213 | 60/281 | 56/181 | 49/180 | 46/192 | 53/217 |
| Density | 0.176 | 0.173 | 0.119 | 0.157 | 0.156 | 0.215 | 0.211 | 0.227 | 0.155 | 0.159 | 0.118 | 0.153 | 0.186 | 0.157 |
| Clustering coefficient | 0.664 | 0.647 | 0.524 | 0.674 | 0.646 | 0.620 | 0.587 | 0.544 | 0.690 | 0.629 | 0.582 | 0.664 | 0.621 | 0.524 |
| D/T | 0.265 | 0.267 | 0.227 | 0.233 | 0.241 | 0.347 | 0.359 | 0.417 | 0.225 | 0.253 | 0.203 | 0.230 | 0.299 | 0.300 |

**Table S12. Main characteristics of the three studied lakes.**

| Lake | Area (km2) | Total capacity of lake (km3) | Average depth (m) | Mean annual precipitation (mm) | Annual water volume transferred (km3) |
| --- | --- | --- | --- | --- | --- |
| Luoma | 375 | 0.918 | 3.8 | 921 | 0.56 |
| Nansi | 30453 | 4.731 | 1.5 | 750 | 0.58 |
| Dongping | 627 | 4.000 | 2.5 | 640 | 0.45 |
